# Supplementary material for: The endosomal RIN2/Rab5C machinery prevents VEGFR2 degradation to control gene expression and tip cell identity during angiogenesis
Source: Angiogenesis. 2021 May 13;24(3):695–714. doi: 10.1007/s10456-021-09788-4 (PMC8292304; doi:10.1007/s10456-021-09788-4)
Supplement: Supplementary file 13 — Electronic supplementary material 13 (XLS 92 kb) [file 10456_2021_9788_MOESM13_ESM.xls]

## Sheet: Data
Gene			Probe		HUVEC-29		HUVEC datasets
							GSE	6241		8699	9055	13637		18373			19735		19816			27631	25269		22325			32547
							PMID	18552508		21324919	19826084	21106851		19962670			20081865		21083900			21764776	22203687		21669038			24797675
Name	ID	Synonyms	Number	Order	Expression	Present	GSM	143726	143727	215557	229941	330313	335393	458348	458349	348350	492832	492833	494829	494830	494831	684735	621827	621828	555682	555683	555684	811216	811218	811220	811222	811224	811226	811228	811230	811232
					(AVG)	(n)	MAS5.0	YES	YES	YES	YES	YES	YES	YES	YES	YES	YES	YES	YES	YES	YES	YES	YES	YES	No	No	No	No	No	No	No	No	No	No	No	No
ALS2	57679	ALS2CR6, ALSJ, FLJ31851,	226291_at	1	645.155	17		1755.4	1293	321	313.2	340.496	288.486	954	619.3	1071.5	1230.88	1173.27	920.188	1083.8	845.646	202.7	274.353	239.105	883.84	1069.55	1039.82	279.397	330.978	352.655	356.484	313.439	267.757	325.651	299.312	264.291
		IAHSP, KIAA1563, MGC87187, PLSJ	232184_at	2	163.047	17		105.8	132.7	79.4	65.8	438.382	52.7278	451	353.5	520.8	170.515	173.883	178.707	141.056	401.508	46.1	69.1864	31.3837	498.744	278.132	235.428	27.8782	53.7028	30.2165	37.3174	35.8614	36.864	21.7441	16.9934	43.0296
			1555284_at	3	68.4685	8		98.5	13.6	14.1	9.5	861.116	9.99231	103.2	45.1	54.4	48.969	318.483	26.1667	48.4716	59.0816	6.8	10.4465	1.08461	73.8299	40.0058	71.1731	7.80691	14.385	7.50623	2.4407	8.60493	10.7279	11.2853	4.99776	3.81025
ALS2CL	259173	DKFZp686P238, MGC129698, RN49018	229887_at	1	139.273	3		208.1	241.5	157.1	52.3	659.185	32.0502	65.6	226.8	203.1	197.849	116.201	197.735	215.99	252.537	19.6	36.43	53.8645	197.464	243.552	256.014	45.3726	46.6273	34.0335	49.7264	47.5099	48.3392	35.5853	33.0878	65.673
			222333_at	2	164.205	2		232.6	430.7	151.9	73.8	441.231	40.8117	130	253.2	215.8	134.044	137.776	163.765	223.691	787.006	41.2	22.4831	46.9755	306.05	256.244	253.3	51.6477	62.8794	30.1814	60.0083	46.487	39.961	44.4928	36.661	47.0519
			243276_at	3	52.7466	0		14.7	21.5	4.8	3.6	147.055	2.491	38.3	37	8.4	123.086	844.027	12.883	13.4065	97.7995	2.7	1.08629	19.6621	13.8572	59.4094	11.9912	2.41222	3.69585	15.0257	9.03919	3.12133	2.02727	8.98695	5.03461	2.5536
GAPVD1	26130	DKFZp434C212, GAPEX5, KIAA1521,	212802_s_at	1	986.929	17		992.8	1835.4	523.5	400.7	405.914	374.563	2589.8	1793.8	2013.5	2066.59	2259.91	1539.22	1499.35	1030.71	305	379.749	359.782	1319.12	1678.07	1609.22	415.869	343.85	479.707	434.551	413.927	399.83	350.944	424.164	381.42
		MGC138847, MGC138848, RAP6	214869_x_at	2	461.284	17		797.7	935	232.3	142.3	131.992	82.3574	993.2	819.6	895.4	583.753	636.641	1092.85	1108.73	663.174	196.7	110.482	82.3043	725.57	768.312	742.217	174.119	183.89	198.884	196.461	164.928	177.455	182.793	205.14	152.987
			212804_s_at	3	664.002	17		858.4	1512.1	309.9	220.9	246.705	230.261	1013.1	1231.4	912.8	918.982	1270.75	1626.28	1416.01	842.382	293.4	249.375	268.891	1168.53	1142.75	1124.87	222.022	311.556	310.155	259.241	285.905	263.838	189.694	278.236	277.622
			235553_at	4	96.8965	0		94.1	42.6	44.2	39.1	274.965	35.4076	94.4	145.6	92.9	509.484	479.083	85.3302	11.0991	59.4113	3.1	32.932	17.5174	150.944	160.036	170.344	12.7932	34.2139	38.0725	30.6409	35.6316	28.7028	33.0013	30.5858	23.8029
RABGEF1	27342	FLJ32302, RABEX5	218310_at	1	392.061	17		448.5	796.9	119.3	133.2	166.969	101.482	1398.4	774.5	910.4	834.331	787.332	455.603	419.105	556.033	102.5	103.4	102.082	795.384	482.792	560.632	178.072	144.055	148.768	187.894	129.272	124.771	140.733	120.166	147.197
			235407_at	2	240.88	9		442.9	257.8	103.4	91.5	855.601	43.9854	240.4	314	212.4	667.407	461.335	211.179	225.59	436.102	73.4	98.3013	99.8321	440.769	279.731	481.597	70.5018	124.194	111.451	93.4541	113.446	76.0084	119.466	96.0213	143.755
RIN1	9610		205211_s_at	1	178.855	14		308.6	353.9	104.2	32.3	594.454	76.1709	295	231.4	304.2	258.001	209.291	276.178	397.745	620.985	37.2	54.9234	40.1287	274.048	220.448	199.787	52.1092	17.043	17.0326	50.3392	29.682	28.0636	40.1587	33.9536	29.4571
RIN2	54453	RASSF4	209684_at	1	2174.37	17		3360.9	4659.7	521.4	921.3	568.764	519.344	3840.1	2792.1	3310.4	5070.21	6979.67	4105.01	2455.37	1824	574.2	664.326	956.5	3761.02	3893	4444.77	913.482	847.955	893.765	492.834	927.346	814.123	932.173	981.53	1031.4
			233811_at	2	54.468	0		101.5	135.4	20.6	35.4	187.847	7.60931	43.4	15.6	4.2	100.675	332.347	60.2722	22.1294	29.7636	8.6	10.7297	19.0855	92.7687	87.9302	44.077	24.6564	31.8543	30.7601	38.2191	8.70677	18.055	16.9505	13.0938	37.3422
RIN3	79890	DKFZp762H1613, FLJ11700, FLJ22439	60471_at	1	236.226	17		461.6	538.2	101.3	94.8	672.648	108.344	253.7	289.4	281.7	454.341	498.139	414.416	395.976	537.517	45.8	110.064	99.2423	341.646	212.223	186.986	66.721	62.3254	50.9142	78.8386	86.8037	92.6459	103	139.947	71.3058
			220439_at	2	91.8936	3		106.4	126.5	27.6	13.6	916.507	5.79909	86	112	55.2	124.512	476.617	42.2448	64.9298	113.527	12.9	8.38268	11.4086	82.6363	82.0226	50.3149	10.6473	16.0364	9.504	19.0269	11.6715	16.9714	13.5976	9.87599	38.4812
			219457_s_at	3	99.0849	3		22.4	154.2	22.2	46.9	271.578	91.2988	118.6	112.6	83.5	311.714	228.875	116.545	247.316	291.562	38.2	60.0764	35.2005	148.4	127.495	10.3673	34.3497	10.4893	15.4577	20.4903	26.4609	43.2189	63.9354	64.2734	55.756
			1562005_at	4	60.0595	0		86.7	63.6	26	7.1	231.599	9.76758	52.1	82	76.8	633.906	269.799	10.3934	7.06062	48.8008	0.9	23.4483	4.86118	10.0856	7.55468	15.0033	3.18171	15.637	13.3567	16.6106	8.06533	11.9345	1.03941	0.616346	3.80527
			219456_s_at	5	52.8774	0		17.2	7.9	35.9	1.8	197.621	1.40039	35.5	6.2	49	385.743	367.259	29.1696	61.618	150.706	4.7	7.72481	10.4131	12.7391	23.239	26.984	9.40169	9.20136	2.38069	8.95908	18.2404	11.5484	22.5268	11.326	7.04237
RINL	126432	-	no probe	n.d.	n.d.	n.d.		n.d.	n.d.	n.d.	n.d.	n.d.	n.d.	n.d.	n.d.	n.d.	n.d.	n.d.	n.d.	n.d.	n.d.	n.d.	n.d.	n.d.	n.d.	n.d.	n.d.	n.d.	n.d.	n.d.	n.d.	n.d.	n.d.	n.d.	n.d.	n.d.

## Sheet: Legend
Column	Description	Explanation
A	Gene: Name	Gene name as annotated in NCBI_Gene
B	Gene: ID	Gene ID, as annotated in NCBI_Gene
C	Gene: Synonyms	Alternative gene names, as annotated in NBCI_Gene
D	Probe: Number	Affymetrix probe number
E	Probe: Order	Probes ranked by product size (descending order)
F	HUVEC-29: Expression (AVG)	Average expression value in HUVEC-29 as determined with MAS5.0 analysis
G	HUVEC-29: Present call (n)	Significant probe expression with MAS5.0 (n = number of samples with expression, 17 maximum)
H-AK	HUVEC Datasets: Expression values *	Dataset GSE ID, PubMed ID, GSM ID, MAS5.0 yes/no
* Black and red expression values indicate significant and absent expression, respectively.

## Sheet: Datasets Used
Dataset Number	MAS5.0 Scores	GEO Study Number	GEO Array Number	PubMed ID
1-1	Yes	GSE6241	GSM143726	18552508
1-2	Yes		GSM143727
2-1	Yes	GSE8699	GSM215557	21324919
3-1	Yes	GSE9055	GSM229941	19826084
4-1	Yes	GSE13637	GSM330313	21106851
4-2	Yes		GSM335393
6-1	Yes	GSE18373	GSM458348	19962670
6-2	Yes		GSM458349
6-3	Yes		GSM458350
7-1	Yes	GSE19735	GSM492832	20081865
7-2	Yes		GSM492833
8-1	Yes	GSE19816	GSM494829	21083900
8-2	Yes		GSM494830
8-3	Yes		GSM494831
9-1	No	GSE22325	GSM555862	21669038
9-2	No		GSM555863
9-3	No		GSM555864
10-1	Yes	GSE27631	GSM684735	21764776
11-1	No	GSE32547	GSM811216	None
11-2	No		GSM811218
11-3	No		GSM811220
11-4	No		GSM811222
11-5	No		GSM811224
11-6	No		GSM811226
11-7	No		GSM811228
11-8	No		GSM811230
11-9	No		GSM811232
12-1	Yes	GSE25269	GSM621827	None
12-2	Yes		GSM621828
